# Supplementary material for: Dry Matter Gains in Maize Kernels Are Dependent on Their Nitrogen Accumulation Rates and Duration during Grain Filling
Source: MDPI journal article supplement (doi:10.3390/plants10061222), 2021-06-15
Supplement: s1 [file s1]

## Supplementary Materials

For Tables S1, S2 and S3:

Linear-plateau model for maize kernel weight (KW, mg grain<sup>-1</sup>) versus thermal time (TT, °C day) after silking:

$$KW = a + b TT, \quad \text{when } TT \leq c$$

$$KW = a + bc, \quad \text{when } TT > c$$

where  $a$  is the  $y$ -intercept (mg),  $b$  is the effective grain-filling rate (EGFR, mg °C day<sup>-1</sup>) and  $c$  is the grain-filling duration (GFD, °C days).

**Table S1.** N rate treatment comparison for parameters  $a$ ,  $b$  (EGFR) and  $c$  (GFD) in Experiment 1 (La Crosse, IN, 2017). For each parameter, contrasts' p-values were adjusted by Tukey method for comparing a family of 3 estimates.

| Parameter    | Contrast    | Estimate | Standard Error | Degrees of Freedom | t ratio | p-value  |
|--------------|-------------|----------|----------------|--------------------|---------|----------|
| $a$          | 0N - 112N   | 17.9     | 5.27           | 24                 | 3.393   | 0.0065   |
|              | 0N - 224N   | 33.4     | 5.22           | 24                 | 6.392   | < 0.0001 |
|              | 112N - 224N | 15.5     | 5.78           | 24                 | 2.68    | 0.0338   |
| EGFR ( $b$ ) | 0N - 112N   | -0.0362  | 0.0064         | 906                | -5.663  | < 0.0001 |
|              | 0N - 224N   | -0.0697  | 0.00633        | 906                | -11.016 | < 0.0001 |
|              | 112N - 224N | -0.0335  | 0.00684        | 906                | -4.892  | < 0.0001 |
| GFD ( $c$ )  | 0N - 112N   | -116.3   | 24.1           | 906                | -4.835  | < 0.0001 |
|              | 0N - 224N   | -143.5   | 24             | 906                | -5.967  | < 0.0001 |
|              | 112N - 224N | -27.2    | 24             | 906                | -1.132  | 0.4943   |

**Table S2.** N rate treatment comparison for parameters  $a$ ,  $b$  (EGFR) and  $c$  (GFD) in Experiment 2 (West Lafayette, IN, 2018). For each parameter, contrasts' p-values are adjusted by Tukey method for comparing a family of 4 estimates.

| Parameter    | Contrast    | Estimate | Standard Error | Degrees of Freedom | t ratio | p-value  |
|--------------|-------------|----------|----------------|--------------------|---------|----------|
| $a$          | 0N - 84N    | 10.37    | 3.63           | 20                 | 2.856   | 0.0445   |
|              | 0N - 168N   | 12.8     | 3.7            | 20                 | 3.458   | 0.0122   |
|              | 0N - 224N   | 8.06     | 3.6            | 20                 | 2.242   | 0.146    |
|              | 84N - 168N  | 2.44     | 4              | 20                 | 0.609   | 0.928    |
|              | 84N - 224N  | -2.31    | 3.9            | 20                 | -0.591  | 0.9337   |
|              | 168N - 224N | -4.74    | 3.97           | 20                 | -1.195  | 0.6371   |
| EGFR ( $b$ ) | 0N - 84N    | -0.0203  | 0.00564        | 822                | -3.596  | 0.002    |
|              | 0N - 168N   | -0.02832 | 0.0055         | 822                | -5.153  | < 0.0001 |
|              | 0N - 224N   | -0.01901 | 0.00526        | 822                | -3.614  | 0.002    |
|              | 84N - 168N  | -0.00802 | 0.00599        | 822                | -1.339  | 0.538    |
|              | 84N - 224N  | 0.00129  | 0.00577        | 822                | 0.224   | 0.996    |
|              | 168N - 224N | 0.00932  | 0.00563        | 822                | 1.655   | 0.3485   |
| GFD ( $c$ )  | 0N - 84N    | 9.55     | 17.7           | 822                | 0.538   | 0.9496   |
|              | 0N - 168N   | -44.24   | 17.7           | 822                | -2.5    | 0.0606   |
|              | 0N - 224N   | -91.36   | 17.9           | 822                | -5.092  | < 0.0001 |
|              | 84N - 168N  | -53.8    | 17.6           | 822                | -3.065  | 0.012    |
|              | 84N - 224N  | -100.91  | 17.8           | 822                | -5.669  | < 0.0001 |
|              | 168N - 224N | -47.11   | 17.8           | 822                | -2.654  | 0.0404   |

**Table S3.** N rate treatment comparison for parameters  $a$ ,  $b$  (EGFR) and  $c$  (GFD) in Experiment 3 (West Lafayette, IN, 2019). For each parameter, contrasts' p-values are adjusted by Tukey method for comparing a family of 4 estimates.

| Parameter    | Contrast    | Estimate | Standard Error | Degrees of Freedom | t ratio | p-value |
|--------------|-------------|----------|----------------|--------------------|---------|---------|
| $a$          | 0N - 84N    | -2.369   | 3.36           | 20                 | -0.705  | 0.8939  |
|              | 0N - 168N   | 1.662    | 3.41           | 20                 | 0.487   | 0.961   |
|              | 0N - 224N   | 0.933    | 3.52           | 20                 | 0.265   | 0.9933  |
|              | 84N - 168N  | 4.031    | 3.34           | 20                 | 1.208   | 0.6293  |
|              | 84N - 224N  | 3.302    | 3.45           | 20                 | 0.957   | 0.7748  |
|              | 168N - 224N | -0.729   | 3.5            | 20                 | -0.208  | 0.9967  |
| EGFR ( $b$ ) | 0N - 84N    | 0.00229  | 0.00611        | 914                | 0.374   | 0.9821  |
|              | 0N - 168N   | -0.01024 | 0.00611        | 914                | -1.674  | 0.338   |
|              | 0N - 224N   | -0.00757 | 0.00626        | 914                | -1.21   | 0.6208  |
|              | 84N - 168N  | -0.01252 | 0.00597        | 914                | -2.097  | 0.155   |
|              | 84N - 224N  | -0.00986 | 0.00612        | 914                | -1.611  | 0.373   |
|              | 168N - 224N | 0.00267  | 0.00613        | 914                | 0.435   | 0.9724  |
| GFD ( $c$ )  | 0N - 84N    | -19.1    | 22             | 914                | -0.869  | 0.8206  |
|              | 0N - 168N   | -37.3    | 21.9           | 914                | -1.703  | 0.3227  |
|              | 0N - 224N   | -56.5    | 22             | 914                | -2.564  | 0.0513  |
|              | 84N - 168N  | -18.2    | 21.9           | 914                | -0.831  | 0.8396  |
|              | 84N - 224N  | -37.3    | 22             | 914                | -1.698  | 0.3254  |
|              | 168N - 224N | -19.1    | 21.9           | 914                | -0.874  | 0.8185  |

For Tables S4, S5 and S6:

Linear-plateau model for maize kernel N content (KNC, mg N grain<sup>-1</sup>) versus thermal time (TT, °C day) after silking:

$$\begin{aligned}
 KNC &= a + b \, TT, & \text{when } TT \leq c \\
 KNC &= a + bc, & \text{when } TT > c
 \end{aligned}$$

where  $a$  is the  $y$ -intercept (mg),  $b$  is the kernel N accumulation rate (KNAR, mg N °C day<sup>-1</sup>) and  $c$  is the kernel N accumulation duration (KNAD, °C days).

**Table S4.** N rate treatment comparison for parameters  $a$ ,  $b$  (KNAR) and  $c$  (KNAD) in Experiment 1 (La Crosse, IN, 2017). For each parameter, contrasts' p-values were adjusted by Tukey method for comparing a family of 3 estimates.

| Parameter    | Contrast    | Estimate | Standard Error | Degrees of Freedom | t ratio | p-value  |
|--------------|-------------|----------|----------------|--------------------|---------|----------|
| $a$          | 0N - 112N   | 0.193    | 0.0604         | 24                 | 3.195   | 0.0105   |
|              | 0N - 224N   | 0.608    | 0.0643         | 24                 | 9.459   | < 0.0001 |
|              | 112N - 224N | 0.415    | 0.0765         | 24                 | 5.43    | < 0.0001 |
| KNAR ( $b$ ) | 0N - 112N   | -0.00112 | 9.14E-05       | 906                | -12.246 | < 0.0001 |
|              | 0N - 224N   | -0.00211 | 0.000101       | 906                | -20.917 | < 0.0001 |
|              | 112N - 224N | -0.00099 | 0.000115       | 906                | -8.543  | < 0.0001 |
| KNAD ( $c$ ) | 0N - 112N   | -122     | 24.1           | 906                | -5.061  | < 0.0001 |
|              | 0N - 224N   | -142.6   | 23.7           | 906                | -6.003  | < 0.0001 |
|              | 112N - 224N | -20.6    | 24.7           | 906                | -0.836  | 0.6808   |

**Table S5.** N rate treatment comparison for parameters  $a$ ,  $b$  (KNAR) and  $c$  (KNAD) in Experiment 2 (West Lafayette, IN, 2018). For each parameter, contrasts' p-values are adjusted by Tukey method for comparing a family of 4 estimates.

| Parameter    | Contrast    | Estimate | Standard Error | Degrees of Freedom | t ratio | p-value  |
|--------------|-------------|----------|----------------|--------------------|---------|----------|
| $a$          | 0N - 84N    | 0.0748   | 0.0422         | 20                 | 1.775   | 0.314    |
|              | 0N - 168N   | 0.2879   | 0.0474         | 20                 | 6.074   | < 0.0001 |
|              | 0N - 224N   | 0.2431   | 0.045          | 20                 | 5.396   | 0.0002   |
|              | 84N - 168N  | 0.2131   | 0.0521         | 20                 | 4.087   | 0.003    |
|              | 84N - 224N  | 0.1683   | 0.05           | 20                 | 3.365   | 0.015    |
|              | 168N - 224N | -0.0448  | 0.0545         | 20                 | -0.822  | 0.8434   |
| KNAR ( $b$ ) | 0N - 84N    | -0.00032 | 7.46E-05       | 822                | -4.329  | 0.0001   |
|              | 0N - 168N   | -0.00117 | 8.03E-05       | 822                | -14.566 | < 0.0001 |
|              | 0N - 224N   | -0.00107 | 7.47E-05       | 822                | -14.269 | < 0.0001 |
|              | 84N - 168N  | -0.00085 | 8.66E-05       | 822                | -9.771  | < 0.0001 |
|              | 84N - 224N  | -0.00074 | 8.15E-05       | 822                | -9.118  | < 0.0001 |
|              | 168N - 224N | 0.000103 | 8.67E-05       | 822                | 1.193   | 0.6315   |
| KNAD ( $c$ ) | 0N - 84N    | -21.9    | 33.6           | 822                | -0.653  | 0.9147   |
|              | 0N - 168N   | -66      | 33.2           | 822                | -1.989  | 0.1929   |
|              | 0N - 224N   | -124.7   | 33.4           | 822                | -3.733  | 0.0012   |
|              | 84N - 168N  | -44.1    | 33.1           | 822                | -1.33   | 0.5438   |
|              | 84N - 224N  | -102.8   | 33.4           | 822                | -3.081  | 0.0114   |
|              | 168N - 224N | -58.7    | 32.9           | 822                | -1.783  | 0.2824   |

**Table S6.** N rate treatment comparison for parameters *a*, *b* (KNAR) and *c* (KNAD) in Experiment 3 (West Lafayette, IN, 2019). For each parameter, contrasts' p-values are adjusted by Tukey method for comparing a family of 4 estimates.

| Parameter         | Contrast    | Estimate | Standard Error | Degrees of Freedom | t ratio | p-value  |
|-------------------|-------------|----------|----------------|--------------------|---------|----------|
| <i>a</i>          | 0N - 84N    | 0.0425   | 0.029          | 20                 | 1.467   | 0.4747   |
|                   | 0N - 168N   | 0.2003   | 0.0302         | 20                 | 6.64    | < 0.0001 |
|                   | 0N - 224N   | 0.1813   | 0.032          | 20                 | 5.658   | 0.0001   |
|                   | 84N - 168N  | 0.1577   | 0.0295         | 20                 | 5.345   | 0.0002   |
|                   | 84N - 224N  | 0.1388   | 0.0314         | 20                 | 4.416   | 0.0014   |
|                   | 168N - 224N | -0.0189  | 0.0325         | 20                 | -0.583  | 0.9361   |
| KNAR ( <i>b</i> ) | 0N - 84N    | -0.00024 | 8.37E-05       | 914                | -2.808  | 0.0261   |
|                   | 0N - 168N   | -0.00079 | 8.49E-05       | 914                | -9.255  | < 0.0001 |
|                   | 0N - 224N   | -0.00082 | 8.65E-05       | 914                | -9.503  | < 0.0001 |
|                   | 84N - 168N  | -0.00055 | 8.45E-05       | 914                | -6.522  | < 0.0001 |
|                   | 84N - 224N  | -0.00059 | 0.000086       | 914                | -6.82   | < 0.0001 |
|                   | 168N - 224N | -3.6E-05 | 8.73E-05       | 914                | -0.409  | 0.9768   |
| KNAD ( <i>c</i> ) | 0N - 84N    | -39.4    | 28.3           | 914                | -1.389  | 0.5065   |
|                   | 0N - 168N   | -49.5    | 28.1           | 914                | -1.761  | 0.2928   |
|                   | 0N - 224N   | -98.5    | 28.3           | 914                | -3.477  | 0.003    |
|                   | 84N - 168N  | -10.1    | 28             | 914                | -0.36   | 0.9841   |
|                   | 84N - 224N  | -59.1    | 28.3           | 914                | -2.091  | 0.1566   |
|                   | 168N - 224N | -49      | 28             | 914                | -1.751  | 0.2978   |

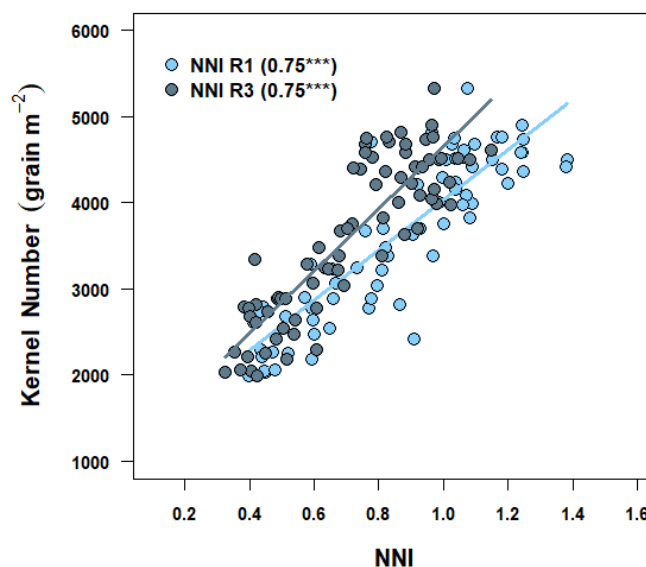

**Figure S1.** Relationship between NNI estimated at R1 (light symbols) and at R3 (dark symbols) and kernel number. Each symbol represents data on a per plot basis from three different field experiments testing N timing application treatments (Exp. 1) and plant densities (Exp. 2 and 3) in combination with N rate treatments.
